# Supplementary material for: Fermenting Acerola (Malpighia emarginata D.C.) and Guava (Psidium guayaba L.) Fruit Processing Co-Products with Probiotic Lactobacilli to Produce Novel Potentially Synbiotic Circular Ingredients
Source: MDPI journal article supplement (doi:10.3390/foods13091375), 2024-04-29
Supplement: s1 [file s1]

**Table S1.** Physicochemical parameters of freeze-dried fruit processing co-products used in assays to evaluate potential prebiotic properties (Araújo et al., 2020).

| Parameters                                  | Fruit processing by-products |                             |
|---------------------------------------------|------------------------------|-----------------------------|
|                                             | Acerola                      | Guava                       |
| Fructose (g/100 g)                          | 8.48 ± 0.01 <sup>A</sup>     | 3.92 ± 0.01 <sup>B</sup>    |
| Glucose (g/100 g)                           | 5.31 ± 0.01 <sup>A</sup>     | 3.17 ± 0.01 <sup>B</sup>    |
| Maltose (g/100 g)                           | 1.52 ± 0.01 <sup>A</sup>     | 1.53 ± 0.01 <sup>A</sup>    |
| Soluble fiber (g/100 g)                     | 8.09 ± 0.69 <sup>B</sup>     | 33.44 ± 3.63                |
| Insoluble fiber (g/100 g)                   | 61.16 ± 1.75 <sup>A</sup>    | 49.12 ± 1.58 <sup>B</sup>   |
| Total dietary fiber (g/100 g)               | 69.25 ± 1.06 <sup>B</sup>    | 82.55 ± 2.05 <sup>A</sup>   |
| Total flavonoids (mg EC/100 g) <sup>1</sup> | 79.83 ± 0.23 <sup>A</sup>    | 44.09 ± 1.01 <sup>B</sup>   |
| Total phenolics (mg EAG/100 g) <sup>2</sup> | 492.107 ± 0.54 <sup>A</sup>  | 304.057 ± 0.94 <sup>B</sup> |

A-B: Different superscript capital letters in the same row denote difference ( $p \leq 0.05$ ), based on Tukey's test. among co-products, based on Student's t-test. <sup>1</sup>The results are expressed in milligram equivalents of catechin (EC) per hundred grams of sample (mg EC/100 g). <sup>2</sup>The results are expressed in milligram equivalents of gallic acid (EAG) per hundred grams of sample (mg EAG/100 g).

**Table S2.** Identification of metabolites by  $^1\text{H}$ -NMR in media with fermented acerola and guava fruit co-products (AL10, ALA5, GL10, and GLA5) and fructooligosaccharides (FOS), as well as in negative control (NC; without fermentable substrate) at time zero (baseline), and 48 h of *in vitro* fecal fermentation.

| Number | Chemical constituents      | NC  |      | FOS |      | ALA5 |      | AL10 |      | GLA5 |      | GL10 |      |
|--------|----------------------------|-----|------|-----|------|------|------|------|------|------|------|------|------|
|        |                            | 0 h | 48 h | 0 h | 48 h | 0 h  | 48 h | 0 h  | 48 h | 0 h  | 48 h | 0 h  | 48 h |
| 1      | Biliary salts              | x   | x    | x   | x    | x    | x    | x    | x    | x    | x    | x    | x    |
| 2      | 2-methylbutyrate           | x   | x    | x   | x    | x    | x    | x    | x    | x    | x    | x    | x    |
| 3      | Valerate                   | x   | x    | x   | x    | x    |      | x    | x    | x    | x    | x    | x    |
| 4      | N-butyrate                 | x   | x    | x   | x    | x    |      | x    | x    | x    | x    | x    | x    |
| 5      | Leucine                    | x   |      | x   | x    | x    |      | x    |      | x    |      | x    |      |
| 6      | Isoleucine                 | x   |      | x   | x    | x    |      | x    |      | x    |      | x    |      |
| 7      | Valine                     | x   |      | x   | x    | x    |      | x    |      | x    |      | x    |      |
| 8      | Propionate/ propionic acid | x   |      | x   | x    | x    |      | x    |      | x    |      | x    |      |
| 9      | Isobutyrate/ butyric acid  | x   |      | x   | x    | x    |      | x    |      | x    |      | x    |      |
| 10     | 3-methyl-2-oxoisovalerate  | x   |      | x   | x    | x    | x    | x    | x    | x    | x    | x    |      |
| 11     | 2-oxoisovalerate           | x   |      | x   | x    | x    | x    | x    | x    | x    | x    | x    |      |
| 12     | Ethanol                    | x   | x    | x   | x    | x    | x    | x    | x    | x    | x    | x    | x    |
| 13     | 3-hydroxybutyrate          | x   | x    | x   | x    | x    | x    | x    | x    | x    | x    | x    | x    |
| 14     | Threonine                  |     |      |     |      |      | x    |      | x    |      | x    |      | x    |
| 15     | Lactate/lactic acid        | x   | x    | x   | x    | x    | x    | x    |      | x    |      | x    |      |
| 16     | Alanine                    | x   | x    | x   | x    | x    | x    | x    | x    | x    | x    | x    | x    |
| 17     | Lysine                     | x   | x    | x   | x    | x    | x    | x    | x    | x    | x    | x    | x    |
| 18     | Ornithine                  | x   | x    | x   | x    | x    | x    | x    | x    | x    | x    | x    | x    |
| 19     | Acetate/acetic acid        | x   | x    | x   | x    | x    | x    | x    | x    | x    | x    | x    | x    |
| 20     | Proline                    | x   | x    | x   |      | x    | x    | x    | x    | x    | x    | x    | x    |
| 21     | Glutamate                  | x   | x    | x   |      | x    | x    | x    | x    | x    | x    | x    | x    |
| 22     | 5-aminopentanoate          | x   |      | x   |      | x    | x    | x    | x    | x    | x    | x    | x    |
| 23     | Succinate/succinic acid    | x   |      |     | x    | x    | x    | x    | x    | x    | x    | x    | x    |
| 24     | Methylamine                | x   | x    | x   | x    | x    | x    | x    | x    | x    | x    | x    | x    |
| 25     | Methionine                 | x   |      | x   |      | x    | x    | x    |      | x    |      | x    | x    |
| 26     | Citrate/citric acid        | x   |      | x   |      | x    | x    | x    |      | x    |      | x    | x    |
| 27     | Aspartate                  | x   |      | x   |      |      |      | x    |      | x    |      | x    | x    |
| 28     | Asparagine                 | x   | x    | x   | x    | x    |      | x    |      | x    |      | x    | x    |
| 29     | Trimethylamine             | x   | x    | x   | x    | x    | x    | x    | x    | x    | x    | x    |      |
| 30     | Putrescine                 | x   | x    | x   | x    | x    | x    | x    | x    | x    | x    | x    | x    |

|    |                                |    |   |   |   |   |   |   |   |   |   |   |   |
|----|--------------------------------|----|---|---|---|---|---|---|---|---|---|---|---|
| 31 | Malonate                       | x  | x | x | x | x | x | x | x | x | x | x | x |
| 32 | Glycine                        | x  | x |   | x |   |   |   |   |   |   |   |   |
| 33 | Fructose                       | x  | x | x | x | x | x | x | x | x | x | x | x |
| 34 | Dihydroxyacetone               | x  | x | x | x | x | x |   |   |   |   |   |   |
| 35 | $\alpha$ -Xylose               | x  |   |   |   | x | x | x | x | x | x | x | x |
| 36 | $\beta$ -Xylose                | x  |   |   |   | x | x | x |   | x |   | x |   |
| 37 | $\beta$ -Glucose               | x  |   |   |   | x | x | x |   | x |   | x |   |
| 38 | $\alpha$ -Glucose              | x  |   |   |   | x |   | x |   | x |   | x |   |
| 39 | $\beta$ -galactose             | x  |   |   |   | x | x | x |   | x |   | x |   |
| 40 | UDP-glucuronate                | x  | x | x |   | x |   | x |   | x | x | x | x |
| 41 | Homovanillate                  | x  |   | x | x | x | x | x | x | x | x | x | x |
| 42 | 3-hydroxyphenylacetate         |    |   |   |   |   |   | x |   | x |   | x |   |
| 43 | P-cresol                       | x  | x | x |   | x | x | x | x | x | x | x | x |
| 44 | Tyrosine                       | x  | x | x |   | x | x | x | x | x | x | x | x |
| 45 | 5-aminosalicylate              | x  |   | x |   | x | x | x | x | x | x | x | x |
| 46 | Phenylalanine                  | xx | x | x |   | x | x | x | x | x | x | x | x |
| 47 | Uracil                         | x  | x | x |   | x | x | x | x | x | x | x | x |
| 48 | N-acetyl-5-aminosalicylate     | x  | x | x |   | x | x | x |   | x |   | x |   |
| 49 | Phenylacetate                  | x  | x | x |   | x | x | x |   | x |   | x |   |
| 50 | Tryptophan                     | x  |   |   |   |   |   | x |   | x |   | x |   |
| 51 | Hypoxanthine                   | x  |   | x |   | x |   | x |   | x |   | x |   |
| 52 | Formate/formic acid            | x  | x | x |   | x | x | x | x | x | x | x | x |
| 53 | Caprylate                      | x  |   | x | x | x | x | x | x | x | x | x | x |
| 54 | Isocaproate                    | x  | x | x |   | x | x | x | x | x | x | x | x |
| 55 | Isovalerate                    | x  |   | x | x | x | x | x | x | x | x | x | x |
| 56 | 3-hydroxyisovalerate           |    |   |   |   |   | x |   | x |   | x |   | x |
| 57 | Total lipids                   | x  | x | x | x | x | x | x | x | x | x | x | x |
| 58 | Gamma-aminobutyric acid (GABA) | x  | x | x | x | x | x | x | x | x | x | x | x |
| 59 | Ketoisovalerate                | x  |   | x | x | x | x | x | x | x | x |   | x |
| 60 | Acetone                        | x  |   | x |   | x | x | x | x | x | x | x | x |
